# Supplementary material for: A comparative study on third trimester fetal biometric parameters with maternal age
Source: PeerJ. 2023 Jan 19;11:e14528. doi: 10.7717/peerj.14528 (PMC9867875; doi:10.7717/peerj.14528)
Supplement: Data S1 [file peerj-11-14528-s001.xlsx]

## Sheet: Yogitha STS
s.no	g.agew	g.aged	m.age	Group	g	h.c	a.c	f.l	e.f.w	bpd	bpdgaw	bpdgad	hcgaw	hcgad	acgaw	acgad	flgaw	flgad	prepregnancyItrimesterweight	presentwt
44	35	4	33	2	2	289.6	263.9	59.4	1655	78.5	31	3	31	6	30	4	31	0	0	0
42	34	4	24	1	1	321.2	315.6	72.7	2782	84.8	34	0	36	2	35	3	37	0	0	0
94	30	1	23	1	1	301.3	292.7	63.8	2152	84	33	5	33	3	33	2	33	0	0	0
86	33	5	28	1	1	299.3	268.3	59.1		78	31	1	33	1	31	0	30	6	0	0
47	36	3	29	1	2	291.9	263.1	59.3	1634	75.9	30	2	32	1	30	3	30	6	0	0
100	32	4	23	1	1	327.7	304.2	69.9	2611	87.4	35	1	37	1	34	3	35	6	0	0
91	32	0	23	1	1	313.5	302.6	65.8	2399	86.9	35	0	35	1	34	2	33	6	0	0
53	33	3	29	1	1	290.4	271	61.4	1813	83.4	33	3	32	0	31	1	31	6	0	0
76	30	4	21	1	1	307.9	257.5	58.8	1635	80.4	32	1	34	2	29	6	30	5	0	0
62	34	5	22	1	3	290.5	273	58.7	1735	79.9	32	1	32	0	31	3	30	5	0	0
16	32	2	24	1	1	334.1	302.6	69.6	2643	90.8	36	5	38	1	34	2	35	5	0	0
80	30	2	20	1	1	306.5	270.4	63.3	1898	82	32	6	34	1	31	1	32	5	0	0
57	31	2	24	1	1	299.1	280.7	63.2	1953	78.6	31	3	33	1	32	1	32	5	0	0
98	32	4	20	1	2	311.5	297	65	2261	82.9	33	2	34	6	33	5	33	4	0	0
7	31	5	29	1	1	322.1	315.7	67.2		85.8	34	4	36	3	35	4	34	4	0	0
14	34	1	30	2	3	324.1	302.8	69.4	2526	84	33	5	36	5	34	2	35	4	0	0
70	34	6	33	2	2	297.6	280.9	63.1	1962	80.5	32	2	33	0	32	1	32	4	0	0
35	32	5	22	1	2	301.8	290.3	66.6	2215	84.3	33	6	33	4	33	0	34	2	0	0
10	31	0	29	1	1	294.2	265.3	60.1	1690	77.2	30	6	32	3	30	5	31	2	0	0
4	31	0	24	1	2	324.8	306.2	68.8	2591	87.7	35	2	36	5	34	4	35	2	0	0
22	30	0	24	1	1	321.4	325.9	70.7	2886	86.7	34	6	36	2	36	4	36	2	0	0
88	30	1	24	1	1	299.3	284.5	64.6	2070	82.9	33	2	33	1	32	3	33	2	0	0
37	32	0	29	1	1	302.7	312.4	66.5	2445	81.4	32	4	33	4	35	1	34	2	0	0
81	30	6	20	1	1	312.8	287.8	66.4	2232	86	34	4	35	0	32	6	34	1	0	0
87	32	5	28	1	1	316.8	288.2	68.3	2344	89.3	36	0	35	4	32	6	35	1	0	0
8	33	1	24	1	1	321	336.5	70.4	3090	91.4	37	0	36	2	37	4	36	1	0	0
13	33	4	36	2	1	304	272.8	61.9	1872	81.8	32	6	33	6	31	3	32	1	0	0
11	33	4	30	2	2	304.4	282.6	64.2		80	32	0	33	6	32	2	33	1	0	0
27	34	1	29	1	1	316	301.3	68.3	2479	87.5	35	2	35	3	34	1	35	1	0	0
93	35	1	25	1	2	288.3	252.8	58.5											0	0
26	31	6	22	1	2	328.7	316.1	66.4	2642	86.4	34	5	37	3	35	4	34	1	77	82
6	32	5	32	2	3	271.8	266.2	57	1553	75.7	30	2	29	5	30	5	29	6	76	81
97	34	4	30	2	1	293.5	263.2	62	1724	77.4	31	0	32	3	30	3	32	0	75	85
83	35	0	30	2	1	327	325.7	67.3	2780	85.2	34	2	37	1	36	3	34	4	75	83
21	31	1	21	1	3	304.8	286.1	61.5	1990	80	32	2	33	6	32	4	31	6	74	79
40	33	1	20	1	3	306.1	300.9	62.2	2217	84.2	33	6	34	1	34	0	32	2	73	79
64	29	4	23	1	3	307.5	298.7	67.3	2371	86.2	34	5	34	2	33	6	34	4	72	84
2	32	2	23	1	1	294.3	270.3	62.3	1812	78.9	31	4	32	3	31	1	32	2	72	79
74	33	4	19	1	1	301.4	280.5	62.3	1938	79.5	31	6	33	3	32	1	32	2	71	81
78	31	0	21	1	3	322.1	322.6	71.1	2817	83.6	33	4	36	3	36	1	36	3	70	83
82	32	6	23	1	3	318.7	313.2	68.6	2628	85.7	34	3	35	6	35	2	35	2	70	78
84	31	5	18	1	2	287.5	265.1	61.1	1695	76.5	30	4	31	4	30	4	31	5	69	75
45	36	6	22	1	2	295	279.6	63	1941	81	32	4	32	4	32	0	32	4	68	79
85	31	4	24	1	2	320.1	305.1	64.9	2436	87.9	35	3	36	1	34	3	33	3	68	75
15	33	6	19	1	1	313.5	283.7	64.6	2137	86.7	34	6	35	1	32	3	33	2	68	79
60	33	5	23	1	3	290.8	270.8	60.2	1748	78.9	31	4	32	0	31	1	31	2	68	77
77	29	5	21	1	2	306.5	308.4	65.9	2417	83.8	33	4	34	1	34	6	34	0	67	74
38	34	3	22	1	2	308	286	65.3	2127	82	32	6	34	3	32	4	33	5	67	76
65	31	4	24	1	2	282.3	254.1	55.7	1431	74.2	29	5	31	0	29	4	29	2	67	75
67	32	3	21	1	1	322.2	311.8	68.8	2666	88.8	35	6	36	3	35	1	35	2	67	75
59	35	1	30	2	2	302.3	281.2	64.2	2011	80.3	32	1	33	4	32	1	33	1	67	74
89	33	4	33	2	1	307.2	300	65.9	2326	84.6	34	0	34	2	34	0	34	0	66	71
71	30	5	26	1	2	312.5	300.3	66.1	2331	82.3	33	0	35	0	34	0	34	0	66	73
68	34	5	22	1	3	301	280	63	1964	81	32	3	33	3	32	0	32	4	66	73
9	31	3	21	1	1	301.4	313.3	67.2	2496	83.6	33	5	33	3	35	2	34	4	66	74
33	32	3	25	1	2	287.5	266.5	59.6	1685	79.4	31	5	31	4	30	5	31	0	65	73
20	30	4	20	1	1	307	290.1	63.6	2130	83.5	33	4	34	2	33	0	32	6	65	74
96	32	3	36	2	1	299.1	284.5	62.9	2015	82.6	33	1	33	1	32	3	32	4	65	71
3	33	3	29	1	3	290.9	275.1	62.1	1852	80	32	0	32	0	31	4	32	1	64	72
30	36	1	28	1	1	306.7	301.2	66.1	2318	81.9	32	6	34	1	34	1	34	0	63	70
61	32	6	18	1	3	307.9	283.4	63.3	2061	84.9	34	1	34	2	32	3	32	5	63	75
23	34	6	20	1	1	289.7	283.5	60.6	1895	80.6	32	2	31	6	32	3	31	4	63	71
1	32	4	20	1	2	292.6	265.8	61.1	1727	78.4	31	3	32	2	30	5	31	5	62	71
56	30	4	32	2	1	310.5	300.1	66.4	2371	86.3	34	5	34	5	34	0	34	1	62	71
52	29	6	23	1	1	312.3	303.5	67.8	2430	83.1	33	2	35	0	34	2	34	6	61	70
36	31	3	28	1	3	316.9	309.9	65.1	2441	83.1	33	2	35	4	35	0	33	4	61	69
66	33	6	19	1	2	298	266.9	60.3	1729	78.5	31	3	33	0	30	6	31	3	61	72
69	31	4	20	1	1	303.5	321.5	66.3	2625	87.3	35	1	33	5	36	0	34	1	61	74
17	31	6	19	1	3	288	262.2	59.4	1626	76.9	30	5	31	5	30	3	31	0	60	69
5	32	5	20	1	3	299.3	289.5	63.7	2095	82.7	33	1	33	1	33	0	32	6	60	68
29	36	2	23	1	1	329.2	320.8	71.8	2915	88.9	35	6	37	3	36	0	36	5	60	69
73	33	2	21	1	2	312.7	300.6	67.5	2404	84.7	34	0	35	0	34	0	34	5	60	69
95	31	2	24	1	2	300.2	283	64.9	2062	82.5	33	1	33	2	32	2	33	3	60	65
72	33	4	32	2	3	283.4	251.2	58	1470	74.7	29	6	31	1	29	2	30	2	60	67
55	33	2	25	1	2	297.9	260.3	60.2	1645	75.4	30	1	33	0	30	1	31	2	60	67
58	31	3	21	1	2	290.8	259.8	59.8	1626	77.6	31	0	32	0	30	1	31	1	60	68
90	35	2	23	1	3	333.2	306.4	70.1	2681	88.6	35	5	38	0	34	4	36	0	59	68
34	31	4	22	1	2	310.3	282.3	65.6	2070	78	31	1	34	5	32	2	33	6	58	67
63	31	3	31	2	3	304.5	299.1	65	2252	81.9	32	6	33	6	33	6	33	4	58	67
48	30	1	20	1	2	296.2	278.4	63.1	1933	80.5	32	2	32	5	31	6	32	4	58	69
18	34	3	27	1	3	325.6	309.6	66.9	2525	83.1	33	2	36	6	34	6	34	3	58	68
54	33	0	21	1	1	300.2	292.3	67	2274	87.4	35	1	33	2	33	2	34	3	58	67
24	30	0	30	2	1	294.8	241.5	53	1308	78.9	31	4	32	4	28	3	28	1	58	65
31	33	2	28	1	1	310.3	296.1	62.5	2156	81.3	32	4	34	5	33	4	32	3	57	73
43	35	5	32	2	3	283.4	251.2	58	1470	74.7	29	6	31	1	29	2	30	2	57	64
32	34	0	31	2	2	300.3	300.9	67.1	2318	81.3	32	4	33	2	34	0	34	4	56	64
19	34	1	18	1	1	301.4	285.9	64.9	2090	81.6	32	5	33	3	32	4	33	3	56	67
39	33	4	32	2	3	298.6	267.6	60.2	1749	80.8	32	3	33	1	30	6	31	2	56	64
25	34	3	21	1	1	313.5	311.7	68.6	2596	86.5	35	0	35	1	35	1	35	2	56	64
99	30	5	26	1	1	304.7	282.1	62.9	1995	81.2	32	4	33	6	32	2	32	4	54	61
49	32	0	27	1	1	311.6	283.5	65.4	2094	79.6	31	6	34	6	32	3	33	5	53	61
79	32	6	29	1	3	290.9	263.4	57.6	1585	75.2	30	1	32	0	30	3	30	1	52	60
46	36	2	31	2	3	296.8	280.7	64	1976	79.4	31	5	32	6	32	1	33	0	50	58
41	34	5	23	1	1	314.9	301.1	67.9	2442	85.8	34	4	35	2	34	1	34	6	50	56
51	30	5	21	1	2	303	286	64.9	2134	85	34	2	33	5	32	5	33	3	50	55
92	34	6	30	2	1	288.3	271.6	60	1744	79	31	4	31	5	31	2	31	2	50	62
50	31	4	31	2	1	271.8	266.2	57	1553	75.7	30	2	29	5	30	5	29	6	45	53
28	35	5	22	1	2	325.9	329.7	69.7	2943	88	35	3	37	0	36	6	35	5	45	62
12	34	1	34	2	1	296.7	276.9	62.7	1914	81.5	32	5	32	6	31	5	32	3	40	60
75	32	1	33	2	3	310.5	286	67.3	2229	85.5	34	3	34	5	32	4	34	4	38	51
