# Supplementary material for: A comparative study on third trimester fetal biometric parameters with maternal age
Source: PeerJ. 2023 Jan 19;11:e14528. doi: 10.7717/peerj.14528 (PMC9867875; doi:10.7717/peerj.14528)
Supplement: Supplemental Information 2 [file peerj-11-14528-s002.xlsx]

## Sheet: Sheet1
	Value	Label
Study Group	1	Age < 30 years
	2	Age≥ 30 years
G( Gravida)	1	Gravida 1
	2	Gravida 2
	3	Gravida 3
Fetal Parameters		biparietal diameter (BPD), head circumference (HC), abdominal circumference (AC) and femur diaphysis length (FL) are measured in MM
Gestational age		calculated as completed weeks and days
